# Supplementary figures and images for: Adherence to Guidelines for Antithrombotic Therapy in Patients with Atrial Fibrillation According to CHADS2 Score before and after Stroke: A Multicenter Observational Study from Korea
Source: PubMed Central journal article supplement — J Clin Neurol. 2015 Nov 4;12(1):34–41. doi: 10.3988/jcn.2016.12.1.34 (PMC4712284; doi:10.3988/jcn.2016.12.1.34), 2015-11-04

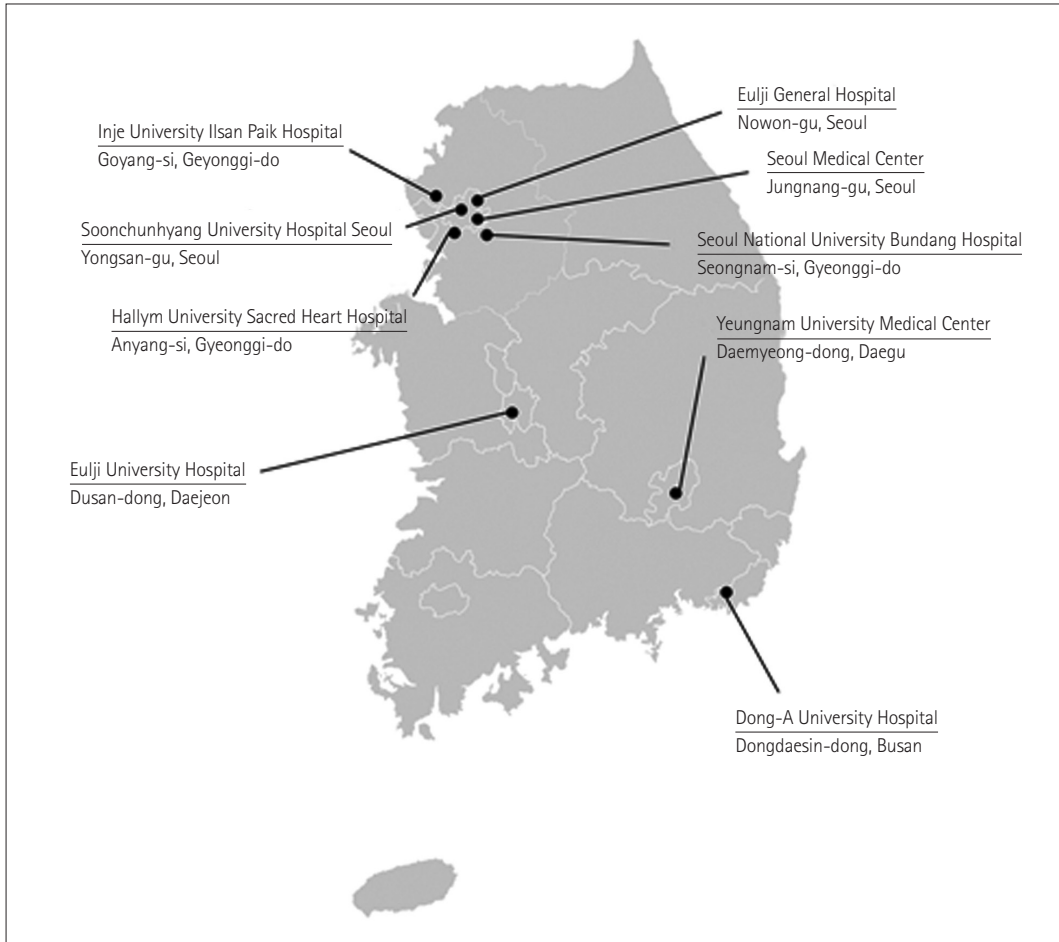

**Supplementary Fig. 1.** Locations of participating centers.

Supplement: jcn-12-34-s001.pdf [file jcn-12-34-s001.pdf]
